# Supplementary material for: Leukotriene receptor antagonists and risk of neuropsychiatric events in children, adolescents and young adults: a self-controlled case series
Source: PubMed Central journal article supplement — Eur Respir J. 2022 Nov 3;60(5):2102467. doi: 10.1183/13993003.02467-2021 (PMC9630607; doi:10.1183/13993003.02467-2021), 2022-11-03
Supplement: ERJ-02467-2021.Supplement.pdf [file ERJ-02467-2021.Supplement.pdf]

## Supplementary Material

### **Leukotriene-receptor antagonist and risk of neuropsychiatric events in children, adolescents, and young adults: A self-controlled case series**

Ji Soo Park, Yoo Jung Cho, Je-Yeon Yun, Hye Jin Lee, Jinho Yu, Hyeon-Jong Yang, Dong In Suh, on behalf of the Korean childhood Asthma REsearch team

#### **Contents**

|                         |       |    |
|-------------------------|-------|----|
| Supplementary Text      | ..... | 2  |
| Supplementary Table S1  | ..... | 3  |
| Supplementary Table S2  | ..... | 16 |
| Supplementary Table S3  | ..... | 18 |
| Supplementary Table S4  | ..... | 21 |
| Supplementary Table S5  | ..... | 22 |
| Supplementary Table S6  | ..... | 23 |
| Supplementary Table S7  | ..... | 24 |
| Supplementary Table S9  | ..... | 26 |
| Supplementary Figure S1 | ..... | 27 |
| Reference               | ..... | 28 |

## Supplementary Text

### MATERIALS AND METHODS

#### Assessment of exposure

One of the main assumptions that the SCCS method relies on is that events do not influence subsequent exposures. To test for this assumption, we drew a histogram of the time interval between the first event of each patient ( $t$ ) and the starting date of exposures ( $u$ ) before and after the first event was plotted. [1] In this case, the first event ( $t$ ) is the first NPE of each participant, and the starting date of exposures ( $u$ ) is the date of LTRA prescription. The x-axis is the number of days from start of LTRA prescription to an NPE ( $t-u$ ). The events on the negative x-axis are events that occurred before the start of exposure, meaning the LTRA was prescribed after the NPE. The events on the positive x-axis are events that occurred after the start of exposure, meaning the LTRA was prescribed before the NPE. If events were sparse in the negative intervals compared to the positive intervals, this would indicate that exposures were delayed after an event (i.e., the event influenced the exposure). If LTRAs were less frequently prescribed due to an NPE, than the events on the negative x-axis would be fewer than those on the positive x-axis. A peak of events on the short x-axis is expected, as these are the events of interest to our study hypothesis. The NPEs that are expected shortly after prescription of LTRA would form a peak on the short positive x-axis.

**Supplementary Table S1. International Statistical Classification of Diseases and Related Health Problems, 10<sup>th</sup> edition (ICD-10) codes for neuropsychiatric diagnoses**

| Type of diagnosis  | ICD-10 code | Diagnosis                                   |
|--------------------|-------------|---------------------------------------------|
| Psychotic disorder | F20         | Schizophrenia                               |
|                    | F20.0       | Paranoid schizophrenia                      |
|                    | F20.1       | Hebephrenic schizophrenia                   |
|                    | F20.2       | Catatonic schizophrenia                     |
|                    | F20.3       | Undifferentiated schizophrenia              |
|                    | F20.4       | Post-schizophrenic depression               |
|                    | F20.5       | Residual schizophrenia                      |
|                    | F20.6       | Simple schizophrenia                        |
|                    | F20.8       | Other schizophrenia                         |
|                    | F20.9       | Schizophrenia, unspecified                  |
|                    | F21         | Schizotypal disorder                        |
|                    | F22         | Persistent delusional disorders             |
|                    | F22.0       | Delusional disorder                         |
|                    | F22.8       | Other persistent delusional disorders       |
|                    | F22.9       | Persistent delusional disorder, unspecified |
|                    | F23         | Acute and transient psychotic disorders     |

- F23.0 Acute polymorphic psychotic disorder without symptoms of schizophrenia
- F23.1 Acute polymorphic psychotic disorder with symptoms of schizophrenia
- F23.2 Acute schizophrenia-like psychotic disorder
- F23.3 Other acute predominantly delusional psychotic disorders
- F23.8 Other acute and transient psychotic disorders
- F23.9 Acute and transient psychotic disorder, unspecified
- F24 Induced delusional disorder
- F25 Schizoaffective disorders
- F25.0 Schizoaffective disorder, manic type
- F25.1 Schizoaffective disorder, depressive type
- F25.2 Schizoaffective disorder, mixed type
- F25.8 Other schizoaffective disorders
- F25.9 Schizoaffective disorder, unspecified
- F28 Other nonorganic psychotic disorders
- F29 Unspecified nonorganic psychosis
- R41.0 Disorientation, unspecified
- R44 Other symptoms and signs involving general sensations and perceptions
- R44.0 Auditory hallucinations
- R44.1 Visual hallucinations
- R44.2 Other hallucinations
- R44.3 Hallucinations, unspecified

R44.8 Other and unspecified symptoms and signs involving general sensations and perceptions

Mood disorder

F30 Manic episode

F30.0 Hypomania

F30.1 Mania without psychotic symptoms

F30.2 Mania with psychotic symptoms

F30.8 Other manic episodes

F30.9 Manic episode, unspecified

F31 Bipolar affective disorder

F31.0 Bipolar affective disorder, current episode hypomanic

F31.1 Bipolar affective disorder, current episode manic without psychotic symptoms

F31.2 Bipolar affective disorder, current episode manic with psychotic symptoms

F31.3 Bipolar affective disorder, current episode mild or moderate depression

F31.4 Bipolar affective disorder, current episode severe depression without psychotic symptoms

F31.5 Bipolar affective disorder, current episode severe depression with psychotic symptoms

F31.6 Bipolar affective disorder, current episode mixed

F31.7 Bipolar affective disorder, currently in remission

F31.8 Other bipolar affective disorders

- F31.9 Bipolar affective disorder, unspecified
- F32 Depressive episode
  - F32.0 Mild depressive episode
  - F32.1 Moderate depressive episode
  - F32.2 Severe depressive episode without psychotic symptoms
  - F32.3 Severe depressive episode with psychotic symptoms
  - F32.8 Other depressive episodes
  - F32.9 Depressive episode, unspecified
- F33 Recurrent depressive disorder
  - F33.0 Recurrent depressive disorder, current episode mild
  - F33.1 Recurrent depressive disorder, current episode moderate
  - F33.2 Recurrent depressive disorder, current episode severe without psychotic symptoms
  - F33.3 Recurrent depressive disorder, current episode severe with psychotic symptoms
  - F33.4 Recurrent depressive disorder, currently in remission
  - F33.8 Other recurrent depressive disorders
  - F33.9 Recurrent depressive disorder, unspecified
- F34 Persistent mood [affective] disorders
  - F34.0 Cyclothymia
  - F34.1 Dysthymia
  - F34.8 Other persistent mood [affective] disorders
  - F34.9 Persistent mood [affective] disorder, unspecified
- F38 Other mood [affective] disorders

- F38.0 Other single mood [affective] disorders
- F38.1 Other recurrent mood [affective] disorders
- F38.8 Other specified mood [affective] disorders
- F39 Unspecified mood [affective] disorder

Anxiety  
disorder

- F40 Phobic anxiety disorders
  - F40.0 Agoraphobia
  - F40.1 Social phobias
  - F40.2 Specific (isolated) phobias
  - F40.8 Other phobic anxiety disorders
  - F40.9 Phobic anxiety disorder, unspecified
- F41 Other anxiety disorders
  - F41.0 Panic disorder [episodic paroxysmal anxiety]
  - F41.1 Generalized anxiety disorder
  - F41.2 Mixed anxiety and depressive disorder
  - F41.3 Other mixed anxiety disorders
  - F41.8 Other specified anxiety disorders
  - F41.9 Anxiety disorder, unspecified
- F42 Obsessive-compulsive disorder
  - F42.0 Predominantly obsessional thoughts or ruminations
  - F42.1 Predominantly compulsive acts [obsessional rituals]
  - F42.2 Mixed obsessional thoughts and acts
  - F42.8 Other obsessive-compulsive disorders

- F42.9 Obsessive-compulsive disorder, unspecified
- F43 Reaction to severe stress, and adjustment disorders
  - F43.0 Acute stress reaction
  - F43.1 Post-traumatic stress disorder
  - F43.2 Adjustment disorders
  - F43.8 Other reactions to severe stress
  - F43.9 Reaction to severe stress, unspecified
- F44 Dissociative [conversion] disorders
  - F44.0 Dissociative amnesia
  - F44.1 Dissociative fugue
  - F44.2 Dissociative stupor
  - F44.3 Trance and possession disorders
  - F44.4 Dissociative motor disorders
  - F44.5 Dissociative convulsions
  - F44.6 Dissociative anaesthesia and sensory loss
  - F44.7 Mixed dissociative [conversion] disorders
  - F44.8 Other dissociative [conversion] disorders
  - F44.9 Dissociative [conversion] disorder, unspecified
- F45 Somatoform disorders
  - F45.0 Somatization disorder
  - F45.1 Undifferentiated somatoform disorder
  - F45.2 Hypochondriacal disorder
  - F45.3 Somatoform autonomic dysfunction
  - F45.4 Persistent somatoform pain disorder



- F45.8 Other somatoform disorders
- F45.9 Somatoform disorder, unspecified
- F48 Other neurotic disorders
- F48.0 Neurasthenia
- F48.1 Depersonalization-derealization syndrome
- F48.8 Other specified neurotic disorders
- F48.9 Neurotic disorder, unspecified
- R45.1 Restlessness and agitation

Sleep-related  
disorder

- F51 Nonorganic sleep disorders
- F51.0 Nonorganic insomnia
- F51.1 Nonorganic hypersomnia
- F51.2 Nonorganic disorder of the sleep-wake schedule
- F51.3 Sleepwalking [somnambulism]
- F51.4 Sleep terrors [night terrors]
- F51.5 Nightmares
- F51.8 Other nonorganic sleep disorders
- F51.9 Nonorganic sleep disorder, unspecified
- G47 Sleep disorders
- G47.0 Disorders of initiating and maintaining sleep [insomnias]
- G47.1 Disorders of excessive somnolence [hypersomnias]
- G47.2 Disorders of the sleep-wake schedule
- G47.3 Sleep apnoea

- G47.30 Obstructive sleep apnoea
- G47.31 Central sleep apnoea
- G47.32 Mixed sleep apnoea
- G47.38 Other sleep apnoea
- G47.4 Narcolepsy and cataplexy
- G47.8 Other sleep disorders
- G47.9 Sleep disorder, unspecified

Cognitive  
disorder

- R41.1 Anterograde amnesia
- R41.2 Retrograde amnesia
- R41.3 Other amnesia
- F90 Hyperkinetic disorders
  - F90.0 Disturbance of activity and attention
  - F90.1 Hyperkinetic conduct disorder
  - F90.8 Other hyperkinetic disorders
  - F90.9 Hyperkinetic disorder, unspecified
- Other behavioural and emotional disorders with onset usually occurring in childhood and adolescence
- F98 Nonorganic enuresis
  - F98.0 Nonorganic enuresis
  - F98.1 Nonorganic encopresis
  - F98.2 Feeding disorder of infancy and childhood
  - F98.3 Pica of infancy and childhood

- F98.4 Stereotyped movement disorders
- F98.5 Stuttering[stammering]
- F98.6 Cluttering
- Other specified behavioural and emotional disorders with
- F98.8 onset usually occurring in  
childhood and adolescence
- Unspecified behavioural and emotional disorders with onset
- F98.9 usually occurring in  
childhood and adolescence

Movement  
disorder

- G20 Parkinson's disease
- G21 Secondary parkinsonism
- G21.0 Malignant neuroleptic syndrome
- G21.1 Other drug-induced secondary parkinsonism
- G21.2 Secondary parkinsonism due to other external agents
- G21.3 Postencephalitic parkinsonism
- G21.4 Vascular parkinsonism
- G21.8 Other secondary parkinsonism
- G21.9 Secondary parkinsonism, unspecified
- G24 Dystonia
- G24.0 Drug-induced dystonia
- G24.1 Idiopathic familial dystonia
- G24.2 Idiopathic nonfamilial dystonia

- G24.3 Spasmodic torticollis
- G24.4 Idiopathic orofacial dystonia
- G24.5 Blepharospasm
- G24.8 Other dystonia
- G24.9 Dystonia, unspecified
- G25 Other extrapyramidal and movement disorders
- G25.0 Essential tremor
- G25.1 Drug-induced tremor
- G25.2 Other specified forms of tremor
- G25.3 Myoclonus
- G25.4 Drug-induced chorea
- G25.5 Other chorea
- G25.6 Drug-induced tics and other tics of organic origin
- G25.8 Other specified extrapyramidal and movement disorders
- G25.9 Extrapyramidal and movement disorder, unspecified

Personality  
disorder

- F60 Specific personality disorders
- F60.0 Paranoid personality disorder
- F60.1 Schizoid personality disorder
- F60.2 Dissocial personality disorder
- F60.3 Emotionally unstable personality disorder
- F60.4 Histrionic personality disorder
- F60.5 Anankastic personality disorder

- F60.6 Anxious[avoidant] personality disorder
- F60.7 Dependent personality disorder
- F60.8 Other specific personality disorders
- F60.9 Personality disorder, unspecified
- F61 Mixed and other personality disorders
- F62 Enduring personality changes, not attributable to brain damage and disease
- F62.0 Enduring personality change after catastrophic experience
- F62.1 Enduring personality change after psychiatric illness
- F62.8 Other enduring personality changes
- F62.9 Enduring personality change, unspecified
- F63 Habit and impulse disorders
- F63.0 Pathological gambling
- F63.1 Pathological fire-setting[pyromania]
- F63.2 Pathological stealing[kleptomania]
- F63.3 Trichotillomania
- F63.8 Other habit and impulse disorders
- F63.9 Habit and impulse disorder, unspecified
- F64 Gender identity disorders
- F64.0 Transsexualism
- F64.1 Dual-role transvestism
- F64.2 Gender identity disorder of childhood
- F64.8 Other gender identity disorders
- F64.9 Gender identity disorder, unspecified

- F65 Disorders of sexual preference
- F65.0 Fetishism
- F65.1 Fetishistic transvestism
- F65.2 Exhibitionism
- F65.3 Voyeurism
- F65.4 Paedophilia
- F65.5 Sadomasochism
- F65.6 Multiple disorders of sexual preference
- F65.8 Other disorders of sexual preference
- F65.9 Disorder of sexual preference, unspecified
- F66 Psychological and behavioural disorders associated with sexual development and orientation
- F66.0 Sexual maturation disorder
- F66.1 Egodystonic sexual orientation
- F66.2 Sexual relationship disorder
- F66.8 Other psychosexual development disorders
- F66.9 Psychosexual development disorder, unspecified
- F68 Other disorders of adult personality and behaviour
- F68.0 Elaboration of physical symptoms for psychological reasons
- F68.1 Intentional production or feigning of symptoms or disabilities, either physical or psychological [factitious disorder]
- F68.8 Other specified disorders of adult personality and behaviour
- F69 Unspecified disorder of adult personality and behaviour

- F94 Disorders of social functioning with onset specific to childhood and adolescence
  - F94.0 Elective mutism
  - F94.1 Reactive attachment disorder of childhood
  - F94.2 Disinhibited attachment disorder of childhood
  - F94.8 Other childhood disorders of social functioning
  - F94.9 Childhood disorder of social functioning, unspecified
-

**Supplementary Table S2. Risk of neuropsychiatric events in relation to leukotriene receptor antagonist use in patients with asthma or allergic rhinitis according to age group and observation period**

| Variable                                    | Children (3–11 years) |             |                   |         | Adolescent (12–18 years) |             |                   |         | Young adult (19–30 years) |             |                   |         |
|---------------------------------------------|-----------------------|-------------|-------------------|---------|--------------------------|-------------|-------------------|---------|---------------------------|-------------|-------------------|---------|
|                                             | No of events          | Person-year | IRR (95% CI)      | P-value | No of events             | Person-year | IRR (95% CI)      | P-value | No of events              | Person-year | IRR (95% CI)      | P-value |
| <b>Observation period 1</b>                 |                       |             |                   |         |                          |             |                   |         |                           |             |                   |         |
| Unexposed                                   | 1,193                 | 3062.25     | 1                 |         | 684                      | 1707.66     | 1                 |         | 3,417                     | 7749.78     | 1                 |         |
| Exposed                                     | 48                    | 154.55      | 0.72 (0.53, 0.97) | 0.036   | 19                       | 46.14       | 1.10 (0.65, 1.75) | 0.707   | 63                        | 170.80      | 0.94 (0.72, 1.22) | 0.675   |
| <b>Time since initiation of LTRA (days)</b> |                       |             |                   |         |                          |             |                   |         |                           |             |                   |         |
| 1-3                                         | 7                     | 43.67       | 0.38 (0.16, 0.74) | 0.011   | 5                        | 12.57       | 1.03 (0.37, 2.24) | 0.950   | 16                        | 51.62       | 0.79 (0.46, 1.26) | 0.359   |
| 4-7                                         | 14                    | 24.28       | 1.36 (0.76, 2.23) | 0.255   | 4                        | 7.16        | 1.44 (0.44, 3.42) | 0.469   | 13                        | 26.48       | 1.25 (0.69, 2.08) | 0.421   |
| 8-14                                        | 7                     | 27.95       | 0.59 (0.25, 1.16) | 0.170   | 3                        | 7.47        | 1.05 (0.26, 2.78) | 0.939   | 17                        | 26.25       | 1.64 (0.97, 2.58) | 0.047   |
| 15-30                                       | 9                     | 30.05       | 0.69 (0.33, 1.26) | 0.275   | 4                        | 8.38        | 1.25 (0.38, 3.04) | 0.661   | 7                         | 29.71       | 0.60 (0.26, 1.17) | 0.181   |
| 31-90                                       | 8                     | 21.37       | 0.85 (0.38, 1.63) | 0.664   | 2                        | 7.04        | 0.78 (0.13, 2.57) | 0.739   | 6                         | 25.20       | 0.59 (0.23, 1.23) | 0.208   |
| >90                                         | 3                     | 7.24        | 1.02 (0.24, 2.95) | 0.981   | 1                        | 3.52        | 0.86 (0.05, 4.47) | 0.888   | 4                         | 11.55       | 0.92 (0.27, 2.34) | 0.874   |
| <b>Observation period 2</b>                 |                       |             |                   |         |                          |             |                   |         |                           |             |                   |         |
| Unexposed                                   | 1,274                 | 3331.54     | 1                 |         | 2661                     | 6393.54     | 1                 |         | 11,799                    | 27302.12    | 1                 |         |
| Exposed                                     | 57                    | 224.27      | 0.61 (0.46, 0.80) | <0.001  | 99                       | 204.97      | 1.32 (1.06, 1.62) | 0.012   | 285                       | 655.26      | 1.20 (1.05, 1.35) | 0.005   |
| <b>Time since initiation of LTRA (days)</b> |                       |             |                   |         |                          |             |                   |         |                           |             |                   |         |



|       |    |       |                   |       |    |       |                   |        |     |        |                   |        |
|-------|----|-------|-------------------|-------|----|-------|-------------------|--------|-----|--------|-------------------|--------|
| 1-3   | 8  | 64.06 | 0.31 (0.14, 0.59) | 0.001 | 18 | 59.39 | 0.79 (0.48, 1.23) | 0.335  | 61  | 213.4  | 0.77 (0.59, 0.99) | 0.047  |
| 4-7   | 10 | 34.56 | 0.72 (0.36, 1.27) | 0.299 | 28 | 30.52 | 2.46 (1.65, 3.52) | <0.001 | 111 | 105.38 | 2.85 (2.35, 3.43) | <0.001 |
| 8-14  | 16 | 34.41 | 1.13 (0.66, 1.80) | 0.625 | 26 | 29.36 | 2.40 (1.58, 3.47) | <0.001 | 64  | 96.55  | 1.79 (1.38, 2.28) | <0.001 |
| 15-30 | 10 | 38.32 | 0.62 (0.31, 1.09) | 0.131 | 11 | 33.30 | 0.89 (0.46, 1.54) | 0.707  | 25  | 105.01 | 0.64 (0.42, 0.93) | 0.026  |
| 31-90 | 8  | 39.21 | 0.48 (0.21, 0.90) | 0.039 | 12 | 33.90 | 0.97 (0.51, 1.66) | 0.911  | 15  | 92.43  | 0.43 (0.25, 0.69) | 0.001  |
| >90   | 5  | 13.71 | 0.85 (0.29, 1.96) | 0.733 | 4  | 18.50 | 0.58 (0.17, 1.45) | 0.300  | 9   | 42.48  | 0.59 (0.27, 1.10) | 0.126  |

---

No, number; IRR, incidence rate ratio; CI, confidence interval; LTRA, leukotriene receptor antagonist

**Supplementary Table S3. Risk of neuropsychiatric events in relation to leukotriene receptor antagonist use in patients with asthma or allergic rhinitis according to type of neuropsychiatric event and observation period.**

| Variable                                    | Psychotic disorder |              |               | Mood disorder |              |               | Anxiety disorder |              |               | Sleep-related disorder |              |               | Cognitive    |              |               | Movement     |              |               | Personality disorder |              |               |
|---------------------------------------------|--------------------|--------------|---------------|---------------|--------------|---------------|------------------|--------------|---------------|------------------------|--------------|---------------|--------------|--------------|---------------|--------------|--------------|---------------|----------------------|--------------|---------------|
|                                             | No of Person       | IRR (95% CI) | P-value       | No of Person  | IRR (95% CI) | P-value       | No of Person     | IRR (95% CI) | P-value       | No of Person           | IRR (95% CI) | P-value       | No of Person | IRR (95% CI) | P-value       | No of Person | IRR (95% CI) | P-value       | No of Person         | IRR (95% CI) | P-value       |
| <b>Observation period 1</b>                 |                    |              |               |               |              |               |                  |              |               |                        |              |               |              |              |               |              |              |               |                      |              |               |
| Unexposed                                   | 97                 | 211.09       | 1             | 1,277         | 2752.8       | 3             | 3,057            | 6804.5       | 0             | 1,916                  | 4177.9       | 1             | 745          | 1811.5       | 8             | 106          | 216.11       | 1             | 78                   | 170.05       | 1             |
| Exposed                                     | 2                  | 7.76         | (0.09, 0.440) | 34            | 80.23        | (0.69, 0.944) | 71               | 186.71       | (0.75, 0.808) | 30                     | 109.15       | (0.42, 0.018) | 31           | 98.11        | (0.48, 0.078) | 4            | 8.73         | (0.41, 0.521) | 2                    | 6.83         | (0.09, 0.498) |
|                                             |                    | 1.90)        |               |               | 1.44)        |               |                  | 1.24)        |               |                        | 0.91)        |               |              | 1.02)        |               |              | 3.78)        |               |                      | 2.10)        |               |
| <b>Time since initiation of LTRA (days)</b> |                    |              |               |               |              |               |                  |              |               |                        |              |               |              |              |               |              |              |               |                      |              |               |
| 1-3                                         | 0                  | 1.87         | NA            | 6             | 21.59        | (0.25, 0.285) | 13               | 53.48        | (0.33, 0.071) | 12                     | 31.56        | (0.48, 0.701) | 8            | 26.37        | (0.31, 0.307) | 1            | 1.86         | (0.20, 0.697) | 0                    | 1.76         | NA            |
|                                             |                    | 1.81         |               |               | 1.78         |               |                  | 1.55         |               |                        | 1.51)        |               |              | 1.03         |               |              | 2.57         |               |                      | 2.05         |               |
| 4-7                                         | 1                  | 1.22         | (0.25, 0.561) | 9             | 11.72        | (0.85, 0.090) | 18               | 29.28        | (0.94, 0.066) | 3                      | 16.67        | (0.10, 0.134) | 7            | 15.45        | (0.44, 0.939) | 1            | 1.13         | (0.35, 0.356) | 1                    | 1.02         | (0.27, 0.485) |
|                                             |                    | 13.28)       |               |               | 3.25)        |               |                  | 2.41)        |               |                        | 1.09)        |               |              | 2.02)        |               |              | 18.97)       |               |                      | 15.31)       |               |
|                                             |                    |              |               |               | 2.03         |               |                  | 1.27         |               |                        | 0.53         |               |              | 0.50         |               |              | 2.06         |               |                      | 1.92         |               |
| 8-14                                        | 0                  | 1.34         | NA            | 11            | 12.57        | (1.04, 0.022) | 15               | 30.23        | (0.72, 0.364) | 4                      | 17.25        | (0.16, 0.211) | 4            | 18.29        | (0.15, 0.165) | 1            | 1.40         | (0.28, 0.479) | 1                    | 1.11         | (0.26, 0.527) |
|                                             |                    |              |               |               | 3.57)        |               |                  | 2.05)        |               |                        | 1.25)        |               |              | 1.17)        |               |              | 15.35)       |               |                      | 14.37)       |               |

|       |   |      |              |   |       |              |    |       |              |   |       |              |   |       |              |   |      |              |   |      |    |    |  |  |
|-------|---|------|--------------|---|-------|--------------|----|-------|--------------|---|-------|--------------|---|-------|--------------|---|------|--------------|---|------|----|----|--|--|
|       |   |      | 1.38         |   |       | 0.61         |    |       | 0.88         |   |       | 0.36         |   |       | 0.64         |   |      | 1.83         |   |      |    |    |  |  |
| 15-30 | 1 | 1.64 | (0.18, 0.752 | 4 | 15.40 | (0.19, 0.332 | 11 | 32.07 | (0.45, 0.666 | 3 | 19.56 | (0.09, 0.076 | 6 | 20.59 | (0.25, 0.291 | 1 | 1.72 | (0.24, 0.559 | 0 | 1.45 | NA | NA |  |  |
|       |   |      | 10.40)       |   |       | 1.45)        |    |       | 1.52)        |   |       | 0.94)        |   |       | 1.33)        |   |      | 13.88)       |   |      |    |    |  |  |
|       |   |      |              |   |       | 0.54         |    |       | 0.85         |   |       | 0.63         |   |       | 0.80         |   |      |              |   |      |    |    |  |  |
| 31-90 | 0 | 1.57 | NA NA        | 3 | 13.23 | (0.13, 0.298 | 9  | 27.08 | (0.40, 0.635 | 5 | 17.42 | (0.22, 0.313 | 5 | 13.61 | (0.28, 0.634 | 0 | 1.71 | NA NA        | 0 | 1.19 | NA | NA |  |  |
|       |   |      |              |   |       | 1.45)        |    |       | 1.57)        |   |       | 1.40)        |   |       | 1.79)        |   |      |              |   |      |    |    |  |  |
|       |   |      |              |   |       | 0.44         |    |       | 0.99         |   |       | 1.03         |   |       | 0.62         |   |      |              |   |      |    |    |  |  |
| >90   | 0 | 0.12 | NA NA        | 1 | 5.71  | (0.02, 0.436 | 5  | 14.58 | (0.34, 0.984 | 3 | 6.69  | (0.24, 0.959 | 1 | 3.80  | (0.03, 0.635 | 0 | 0.92 | NA NA        | 0 | 0.30 | NA | NA |  |  |
|       |   |      |              |   |       | 2.22)        |    |       | 2.33)        |   |       | 2.96)        |   |       | 3.07)        |   |      |              |   |      |    |    |  |  |

---

**Observation period 2**

|           |     |        |              |       |        |              |        |        |              |       |        |              |     |        |              |     |        |              |     |        |              |  |       |  |
|-----------|-----|--------|--------------|-------|--------|--------------|--------|--------|--------------|-------|--------|--------------|-----|--------|--------------|-----|--------|--------------|-----|--------|--------------|--|-------|--|
| Unexposed | 369 | 757.61 | 1            | 4,021 | 8367.3 | 1            | 10,051 | 22319. | 1            | 7,057 | 15805. | 1            | 621 | 1393.5 | 1            | 692 | 1440.2 | 1            | 173 | 331.17 | 1            |  |       |  |
|           |     |        |              | 5     |        |              |        | 33     |              |       | 4      |              |     | 5      |              |     | 1      |              |     |        |              |  |       |  |
|           |     |        | 1.40         |       |        | 1.20         |        |        | 1.01         |       |        | 0.99         |     |        | 0.79         |     |        | 1.15         |     |        |              |  | 1.33  |  |
| Exposed   | 16  | 34.57  | (0.79, 0.223 | 138   | 295.63 | (1.00, 0.045 | 236    | 599.90 | (0.88, 0.834 | 189   | 494.35 | (0.85, 0.897 | 24  | 73.79  | (0.51, 0.290 | 26  | 57.13  | (0.74, 0.516 | 7   | 13.91  | (0.54, 0.489 |  |       |  |
|           |     |        | 2.33)        |       |        | 1.44)        |        |        | 1.16)        |       |        | 1.15)        |     |        | 1.19)        |     |        | 1.71)        |     |        |              |  | 2.79) |  |

---

**Time since initiation of LTRA (days)**

|     |   |      |              |    |       |               |    |        |               |    |        |               |   |       |              |   |       |              |   |      |              |  |       |  |
|-----|---|------|--------------|----|-------|---------------|----|--------|---------------|----|--------|---------------|---|-------|--------------|---|-------|--------------|---|------|--------------|--|-------|--|
|     |   |      | 0.74         |    |       | 0.78          |    |        | 0.52          |    |        | 0.87          |   |       | 0.47         |   |       | 0.48         |   |      |              |  | 1.39  |  |
| 0-3 | 2 | 7.23 | (0.12, 0.666 | 24 | 75.08 | (0.51, 0.234  | 40 | 194.68 | (0.37, <0.001 | 50 | 147.85 | (0.65, 0.317  | 4 | 21.18 | (0.14, 0.130 | 3 | 15.10 | (0.12, 0.204 | 2 | 3.47 | (0.34, 0.650 |  |       |  |
|     |   |      | 2.31)        |    |       | 1.13)         |    |        | 0.70)         |    |        | 1.13)         |   |       | 1.09)        |   |       | 1.25)        |   |      |              |  | 5.70) |  |
|     |   |      |              |    |       | 0.61          |    |        | 2.01          |    |        | 2.40          |   |       | 1.13         |   |       | 2.50         |   |      |              |  |       |  |
| 4-7 | 1 | 4.52 | (0.03, 0.626 | 34 | 41.85 | (1.40, <0.001 | 89 | 94.39  | (1.92, <0.001 | 59 | 79.25  | (1.46, <0.001 | 5 | 10.92 | (0.40, 0.790 | 8 | 7.72  | (1.13, 0.011 | 0 | 2.11 | NA NA        |  |       |  |
|     |   |      | 2.74)        |    |       | 2.78)         |    |        | 2.94)         |    |        | 2.46)         |   |       | 2.46)        |   |       | 4.74)        |   |      |              |  |       |  |

|       |   |      |              |    |       |               |    |       |              |    |       |              |   |       |              |   |       |              |   |      |              |
|-------|---|------|--------------|----|-------|---------------|----|-------|--------------|----|-------|--------------|---|-------|--------------|---|-------|--------------|---|------|--------------|
|       |   |      | 3.43         |    |       | 2.19          |    |       | 1.58         |    |       | 1.34         |   |       | 1.13         |   |       | 1.65         |   |      | 3.60         |
| 8-14  | 6 | 5.1  | (1.33, 0.004 | 38 | 43.47 | (1.55, <0.001 | 53 | 85.20 | (1.19, 0.001 | 40 | 77.23 | (0.96, 0.070 | 5 | 10.81 | (0.40, 0.792 | 5 | 7.32  | (0.59, 0.270 | 3 | 2.06 | (1.11, 0.032 |
|       |   |      | 7.21)        |    |       | 2.99)         |    |       | 2.06)        |    |       | 1.81)        |   |       | 2.46)        |   |       | 3.61)        |   |      | 11.6)        |
|       |   |      | 0.47         |    |       | 1.08          |    |       | 0.77         |    |       | 0.52         |   |       | 0.19         |   |       | 1.05         |   |      | 1.30         |
| 15-30 | 1 | 6.34 | (0.03, 0.450 | 22 | 51.71 | (0.69, 0.708  | 29 | 95.46 | (0.52, 0.161 | 17 | 83.59 | (0.31, 0.007 | 1 | 12.85 | (0.01, 0.097 | 4 | 9.22  | (0.32, 0.923 | 1 | 1.92 | (0.18, 0.797 |
|       |   |      | 2.11)        |    |       | 1.62)         |    |       | 1.09)        |    |       | 0.81)        |   |       | 0.84)        |   |       | 2.49)        |   |      | 9.50)        |
|       |   |      | 2.47         |    |       | 0.71          |    |       | 0.47         |    |       | 0.54         |   |       | 1.27         |   |       | 0.75         |   |      | 1.04         |
| 31-90 | 5 | 6.97 | (0.85, 0.059 | 15 | 54.72 | (0.41, 0.200  | 16 | 87.13 | (0.27, 0.003 | 16 | 76.24 | (0.31, 0.014 | 7 | 13.57 | (0.53, 0.546 | 3 | 10.73 | (0.18, 0.632 | 1 | 2.41 | (0.14, 0.971 |
|       |   |      | 5.72)        |    |       | 1.15)         |    |       | 0.74)        |    |       | 0.85)        |   |       | 2.56)        |   |       | 2.03)        |   |      | 7.82)        |
|       |   |      | 0.92         |    |       | 0.49          |    |       | 0.57         |    |       | 0.55         |   |       | 1.16         |   |       | 1.30         |   |      |              |
| >90   | 1 | 4.42 | (0.05, 0.935 | 5  | 28.79 | (0.17, 0.123  | 9  | 43.06 | (0.26, 0.107 | 7  | 30.20 | (0.23, 0.130 | 2 | 4.47  | (0.19, 0.839 | 3 | 7.04  | (0.30, 0.681 | 0 | 1.94 | NA NA        |
|       |   |      | 4.78)        |    |       | 1.1)          |    |       | 1.07)        |    |       | 1.11)        |   |       | 3.98)        |   |       | 3.97)        |   |      |              |

---

No, number; IRR, incidence rate ratio; CI, confidence interval; LTRA, leukotriene receptor antagonist

**Supplementary Table S4. Risk of neuropsychiatric events in relation to leukotriene receptor antagonist use in patients with asthma or allergic rhinitis according to indication of leukotriene receptor antagonist**

| Variable                             | Asthma       |             |                   |         | Allergic rhinitis only |             |                   |         |
|--------------------------------------|--------------|-------------|-------------------|---------|------------------------|-------------|-------------------|---------|
|                                      | No of events | Person-year | IRR (95% CI)      | P-value | No of events           | Person-year | IRR (95% CI)      | P-value |
| Unexposed                            | 12,950       | 30489.35    | 1                 |         | 8,078                  | 19057.54    | 1                 |         |
| Exposed                              | 409          | 1059.03     | 1.00 (0.90, 1.10) | 0.938   | 162                    | 396.95      | 1.19 (1.01, 1.39) | 0.038   |
| Time since initiation of LTRA (days) |              |             |                   |         |                        |             |                   |         |
| 1-3                                  | 86           | 310.60      | 0.71 (0.57, 0.87) | 0.002   | 29                     | 134.10      | 0.75 (0.42, 0.87) | 0.010   |
| 4-7                                  | 118          | 161.45      | 1.87 (1.55, 2.24) | <0.001  | 62                     | 66.93       | 2.14 (2.06, 3.42) | <0.001  |
| 8-14                                 | 90           | 160.14      | 1.44 (1.16, 1.77) | 0.001   | 43                     | 61.86       | 1.63 (1.47, 2.70) | <0.001  |
| 15-30                                | 48           | 182.12      | 0.67 (0.50, 0.88) | 0.006   | 18                     | 62.64       | 0.67 (0.50, 1.28) | 0.426   |
| 31-90                                | 43           | 166.93      | 0.65 (0.47, 0.87) | 0.006   | 8                      | 52.21       | 0.60 (0.20, 0.83) | 0.022   |
| >90                                  | 24           | 77.79       | 0.81 (0.52, 1.22) | 0.347   | 2                      | 19.20       | 0.76 (0.05, 0.92) | 0.082   |

No, number; IRR, incidence rate ratio; CI, confidence interval; LTRA, leukotriene receptor antagonist

**Supplementary Table S5. Risk of neuropsychiatric events in relation to leukotriene receptor antagonist use in patients with asthma or allergic rhinitis according to type of leukotriene receptor antagonist**

| Variable                                    | Montelukast  |             |                   |         | Pranlukast   |             |                   |         |
|---------------------------------------------|--------------|-------------|-------------------|---------|--------------|-------------|-------------------|---------|
|                                             | No of events | Person-year | IRR (95% CI)      | P-value | No of events | Person-year | IRR (95% CI)      | P-value |
| Unexposed                                   | 16,114       | 37889.88    | 1                 |         | 2,730        | 6599.50     | 1                 |         |
| Exposed                                     | 416          | 1077.87     | 1.07 (0.96, 1.18) | 0.210   | 57           | 95.22       | 1.81 (1.36, 2.36) | <0.001  |
| <b>Time since initiation of LTRA (days)</b> |              |             |                   |         |              |             |                   |         |
| 1-3                                         | 83           | 313.00      | 0.72 (0.58, 0.89) | 0.003   | 12           | 38.69       | 0.91 (0.51, 1.60) | 0.735   |
| 4-7                                         | 122          | 164.19      | 2.03 (1.68, 2.42) | <0.001  | 22           | 16.83       | 3.92 (2.56, 6.02) | <0.001  |
| 8-14                                        | 91           | 162.92      | 1.54 (1.24, 1.88) | <0.001  | 16           | 14.68       | 3.34 (2.02, 5.52) | <0.001  |
| 15-30                                       | 53           | 185.87      | 0.78 (0.59, 1.02) | 0.077   | 5            | 12.93       | 1.18 (0.48, 2.86) | 0.720   |
| 31-90                                       | 45           | 171.67      | 0.72 (0.53, 0.96) | 0.034   | 2            | 9.05        | 0.68 (0.17, 2.79) | 0.592   |
| >90                                         | 22           | 80.23       | 0.79 (0.49, 1.20) | 0.296   | 0            | 3.05        | NA                | NA      |

No, number; IRR, incidence rate ratio; CI, confidence interval; LTRA, leukotriene receptor antagonist

**Supplementary Table S6. Risk of neuropsychiatric events in relation to leukotriene receptor antagonist use in patients with asthma or allergic rhinitis according to sex**

| Variable                                    | Male         |             |                   |         | Female       |             |                   |         |
|---------------------------------------------|--------------|-------------|-------------------|---------|--------------|-------------|-------------------|---------|
|                                             | No of events | Person-year | IRR (95% CI)      | P-value | No of events | Person-year | IRR (95% CI)      | P-value |
| Unexposed                                   | 8,560        | 20806.96    | 1                 |         | 12,468       | 28739.93    | 1                 |         |
| Exposed                                     | 280          | 730.54      | 1.07 (0.94, 1.22) | 0.266   | 291          | 725.44      | 1.04 (0.91, 1.17) | 0.567   |
| <b>Time since initiation of LTRA (days)</b> |              |             |                   |         |              |             |                   |         |
| 1-3                                         | 61           | 197.31      | 0.86 (0.66, 1.10) | 0.257   | 54           | 247.39      | 0.56 (0.42, 0.72) | <0.001  |
| 4-7                                         | 70           | 111.79      | 1.75 (1.37, 2.21) | <0.001  | 110          | 116.59      | 2.41 (1.98, 2.90) | <0.001  |
| 8-14                                        | 71           | 116.31      | 1.69 (1.32, 2.13) | <0.001  | 62           | 105.68      | 1.51 (1.16, 1.93) | 0.001   |
| 15-30                                       | 34           | 130.64      | 0.71 (0.50, 0.98) | 0.051   | 32           | 114.12      | 0.72 (0.50, 1.01) | 0.068   |
| 31-90                                       | 27           | 122.05      | 0.60 (0.40, 0.87) | 0.010   | 24           | 97.10       | 0.63 (0.41, 0.93) | 0.029   |
| >90                                         | 17           | 52.43       | 0.95 (0.55, 1.54) | 0.851   | 9            | 44.56       | 0.51 (0.24, 0.96) | 0.057   |

No, number; IRR, incidence rate ratio; CI, confidence interval; LTRA, leukotriene receptor antagonist

**Supplementary Table S7. Risk of neuropsychiatric events in relation to leukotriene receptor antagonist use in patients with severe asthma according to type of observation period**

| Variable                                    | Total period |             |                   |         | Obs period 1 |             |                   |         | Obs period 2 |             |                   |         |
|---------------------------------------------|--------------|-------------|-------------------|---------|--------------|-------------|-------------------|---------|--------------|-------------|-------------------|---------|
|                                             | No of events | Person-year | IRR (95% CI)      | P-value | No of events | Person-year | IRR (95% CI)      | P-value | No of events | Person-year | IRR (95% CI)      | P-value |
| Unexposed                                   | 21028        | 49546.89    | 1                 |         | 5,294        | 12519.69    | 1                 |         | 15,734       | 37027.20    | 1                 |         |
| Exposed                                     | 571          | 1455.98     | 1.05 (0.96, 1.15) | 0.266   | 130          | 371.49      | 0.88 (0.73, 1.06) | 0.185   | 441          | 1084.50     | 1.11 (1.00, 1.22) | 0.047   |
| <b>Time since initiation of LTRA (days)</b> |              |             |                   |         |              |             |                   |         |              |             |                   |         |
| 1-3                                         | 6            | 21.77       | 0.63 (0.25, 1.3)  | 0.269   | 5            | 13.93       | 0.80 (0.28, 1.74) | 0.616   | 1            | 7.85        | 0.30 (0.02, 1.36) | 0.236   |
| 4-7                                         | 10           | 15.41       | 1.48 (0.73, 2.63) | 0.228   | 5            | 9.98        | 1.09 (0.39, 2.4)  | 0.843   | 5            | 5.43        | 2.19 (0.77, 4.83) | 0.087   |
| 8-14                                        | 10           | 19.54       | 1.18 (0.59, 2.11) | 0.604   | 7            | 12.44       | 1.24 (0.52, 2.45) | 0.584   | 3            | 7.10        | 1.04 (0.26, 2.76) | 0.944   |
| 15-30                                       | 8            | 26.98       | 0.69 (0.31, 1.31) | 0.304   | 5            | 15.96       | 0.69 (0.24, 1.53) | 0.424   | 3            | 11.03       | 0.68 (0.17, 1.80) | 0.505   |
| 31-90                                       | 9            | 31.49       | 0.66 (0.31, 1.23) | 0.231   | 6            | 16.73       | 0.77 (0.30, 1.63) | 0.535   | 3            | 14.77       | 0.52 (0.13, 1.40) | 0.267   |
| >90                                         | 5            | 18.00       | 0.65 (0.22, 1.52) | 0.377   | 2            | 7.50        | 0.60 (0.09, 2.07) | 0.494   | 3            | 10.51       | 0.78 (0.18, 2.31) | 0.697   |

No, number; IRR, incidence rate ratio; CI, confidence interval; LTRA, leukotriene receptor antagonist



**Supplementary Table S8. Risk of neuropsychiatric events in relation to leukotriene receptor antagonist use in patients with asthma or allergic rhinitis, allowing for a 3-month interval between events**

| Variable                                    | Total period |             |                   |         | Obs period 1 |             |                   |         | Obs period 2 |             |                   |         |
|---------------------------------------------|--------------|-------------|-------------------|---------|--------------|-------------|-------------------|---------|--------------|-------------|-------------------|---------|
|                                             | No of events | Person-year | IRR (95% CI)      | P-value | No of events | Person-year | IRR (95% CI)      | P-value | No of events | Person-year | IRR (95% CI)      | P-value |
| Unexposed                                   | 24240        | 49546.89    | 1                 |         | 6,079        | 12519.69    | 1                 |         | 18,161       | 37027.20    | 1                 |         |
| Exposed                                     | 680          | 1455.98     | 0.92 (0.85, 0.99) | 0.038   | 148          | 371.49      | 0.81 (0.68, 0.96) | 0.015   | 532          | 1084.50     | 1.02 (0.93, 1.12) | 0.663   |
| <b>Time since initiation of LTRA (days)</b> |              |             |                   |         |              |             |                   |         |              |             |                   |         |
| 1-3                                         | 139          | 444.70      | 0.62 (0.53, 0.73) | <0.001  | 32           | 107.86      | 0.60 (0.42, 0.84) | 0.004   | 107          | 336.85      | 0.67 (0.55, 0.81) | <0.001  |
| 4-7                                         | 193          | 228.38      | 1.68 (1.45, 1.93) | <0.001  | 32           | 57.92       | 1.12 (0.77, 1.56) | 0.540   | 161          | 170.46      | 1.99 (1.69, 2.32) | <0.001  |
| 8-14                                        | 147          | 221.99      | 1.31 (1.11, 1.54) | 0.001   | 31           | 61.66       | 1.03 (0.70, 1.44) | 0.892   | 116          | 160.33      | 1.51 (1.25, 1.81) | <0.001  |
| 15-30                                       | 81           | 244.77      | 0.64 (0.51, 0.80) | <0.001  | 25           | 68.13       | 0.74 (0.48, 1.08) | 0.144   | 56           | 176.64      | 0.65 (0.49, 0.83) | 0.001   |
| 31-90                                       | 69           | 219.15      | 0.59 (0.46, 0.75) | <0.001  | 18           | 53.61       | 0.66 (0.40, 1.03) | 0.088   | 51           | 165.54      | 0.61 (0.46, 0.80) | 0.001   |
| >90                                         | 51           | 96.99       | 1.00 (0.73, 1.33) | 0.99    | 10           | 22.30       | 0.99 (0.48, 1.04) | 0.975   | 41           | 74.69       | 1.11 (0.79, 1.54) | 0.528   |

No, number; IRR, incidence rate ratio; CI, confidence interval; LTRA, leukotriene receptor antagonist

**Supplementary Table S9. Risk of neuropsychiatric events in relation to leukotriene receptor antagonist use in patients with asthma or allergic rhinitis according to age groups, allowing for a 3-month interval between events**

| Variable                                    | Children (3–11 years) |             |                   |         | Adolescent (12–18 years) |             |                   |         | Young adult (19–30 years) |             |                   |         |
|---------------------------------------------|-----------------------|-------------|-------------------|---------|--------------------------|-------------|-------------------|---------|---------------------------|-------------|-------------------|---------|
|                                             | No of events          | Person-year | IRR (95% CI)      | P-value | No of events             | Person-year | IRR (95% CI)      | P-value | No of events              | Person-year | IRR (95% CI)      | P-value |
| Unexposed                                   | 2,759                 | 6393.79     | 1                 |         | 3872                     | 8101.20     | 1                 |         | 17,609                    | 35051.90    | 1                 |         |
| Exposed                                     | 122                   | 378.82      | 0.63 (0.52, 0.76) | <0.001  | 138                      | 251.11      | 1.13 (0.94, 1.36) | 0.172   | 420                       | 826.05      | 1.02 (0.92, 1.12) | 0.768   |
| <b>Time since initiation of LTRA (days)</b> |                       |             |                   |         |                          |             |                   |         |                           |             |                   |         |
| 1-3                                         | 15                    | 107.73      | 0.29 (0.17, 0.47) | <0.001  | 32                       | 71.96       | 0.90 (0.62, 1.26) | 0.557   | 92                        | 265.02      | 0.70 (0.57, 0.86) | 0.001   |
| 4-7                                         | 25                    | 58.84       | 0.88 (0.57, 1.27) | 0.510   | 33                       | 37.69       | 1.81 (1.26, 2.52) | 0.001   | 135                       | 131.86      | 2.05 (1.72, 2.42) | <0.001  |
| 8-14                                        | 28                    | 62.37       | 0.90 (0.61, 1.29) | 0.601   | 32                       | 36.83       | 1.81 (1.25, 2.53) | 0.001   | 87                        | 122.80      | 1.41 (1.13, 1.73) | 0.002   |
| 15-30                                       | 22                    | 68.37       | 0.62 (0.39, 0.93) | 0.028   | 17                       | 41.68       | 0.83 (0.49, 1.30) | 0.441   | 42                        | 134.72      | 0.61 (0.44, 0.82) | 0.002   |
| 31-90                                       | 18                    | 60.57       | 0.55 (0.33, 0.85) | 0.013   | 16                       | 40.94       | 0.76 (0.44, 1.22) | 0.296   | 35                        | 117.63      | 0.57 (0.40, 0.79) | 0.001   |
| >90                                         | 14                    | 20.94       | 1.24 (0.67, 2.13) | 0.460   | 8                        | 22.01       | 0.78 (0.34, 1.56) | 0.518   | 29                        | 54.03       | 1.03 (0.68, 1.51) | 0.871   |

No, number; IRR, incidence rate ratio; CI, confidence interval; LTRA, leukotriene receptor antagonist

**Supplementary Figure S1. Histogram of time intervals from leukotriene receptor antagonist prescription date to neuropsychiatric event**

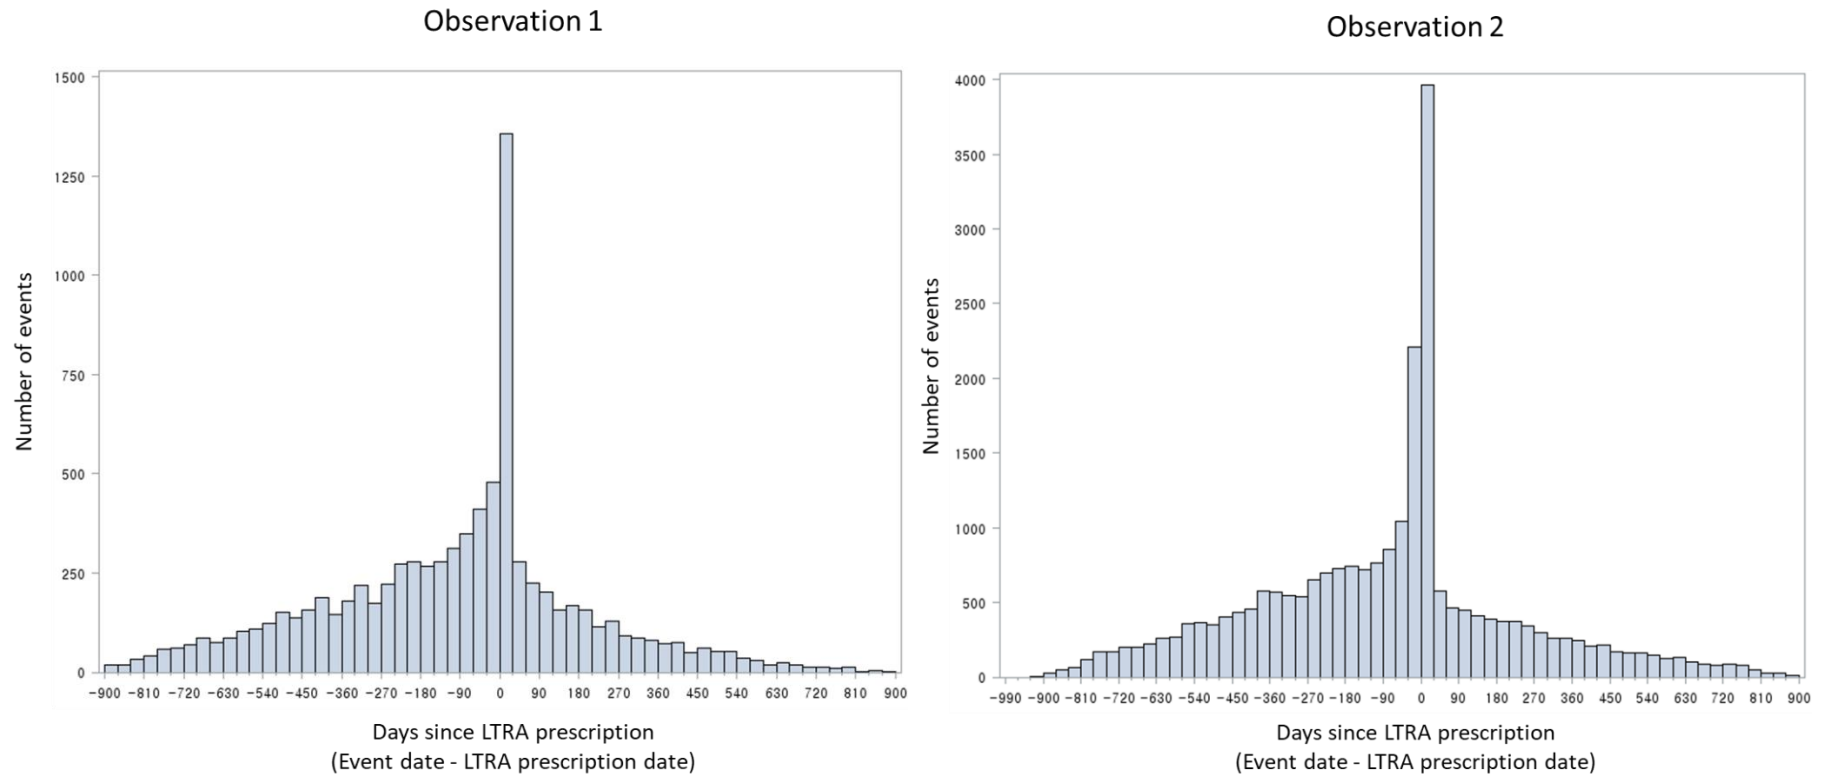

## **REFERENCE**

1. Farrington, P., Whitaker, H., & Weldeselassie, Y.G. (2018). *Self-Controlled Case Series Studies: A Modelling Guide with R* (2nd ed.). Chapman and Hall/CRC
